# Supplementary material for: Flexible free-standing hollow Fe3O4/graphene hybrid films for lithium-ion batteries
Source: Royal Society of Chemistry journal article supplement (doi:10.1039/c2ta00753c), 2012-11-26
Supplement: c2ta00753c.pdf [file c2ta00753c.pdf]

## Supplementary Information

Flexible free-standing hollow Fe<sub>3</sub>O<sub>4</sub>/graphene hybrid films for  
lithium-ion batteries

*Ronghua Wang, Chaohe Xu, Jing Sun<sup>\*</sup>, Lian Gao and Chucheng Lin*

The State Key Lab of High Performance Ceramics and Superfine Microstructure,  
Shanghai Institute of Ceramics, Chinese Academy of Sciences, 1295 Ding Xi Road,  
Shanghai 200050, China

---

<sup>\*</sup> Corresponding author. Tel: +86 21 52414301. Fax: +86 21 52413122.

E-mail address: [jingsun@mail.sic.ac.cn](mailto:jingsun@mail.sic.ac.cn) (J. Sun)

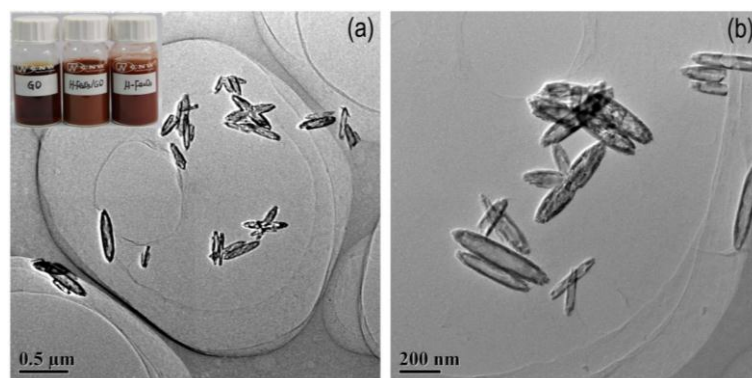

**Figure S1.** TEM images of the H-Fe<sub>2</sub>O<sub>3</sub>/GO homogeneous suspension. The inset is a photograph of the GO, H-Fe<sub>2</sub>O<sub>3</sub>/GO and H-Fe<sub>2</sub>O<sub>3</sub> suspensions (from left to right), respectively.

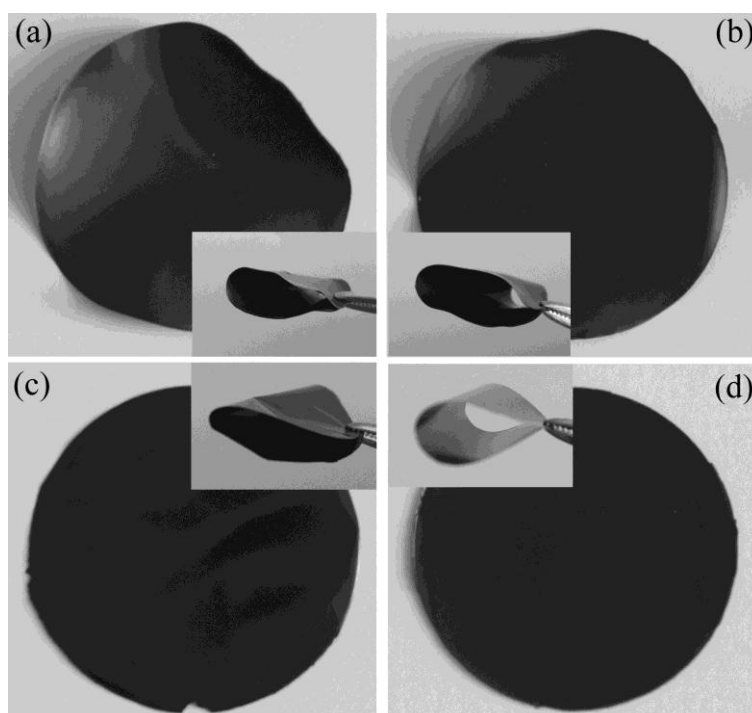

**Figure S2.** Photographs of the flexible H-Fe<sub>2</sub>O<sub>3</sub>/GO films (a) H-Fe<sub>2</sub>O<sub>3</sub>/GO-1, (b) H-Fe<sub>2</sub>O<sub>3</sub>/GO-2, (c) H-Fe<sub>2</sub>O<sub>3</sub>/GO-3, (d) H-Fe<sub>2</sub>O<sub>3</sub>/GO-4.

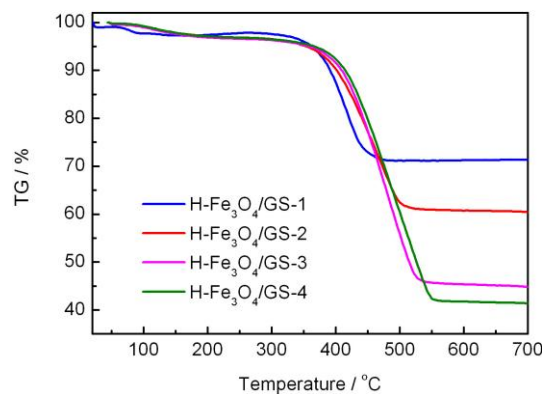

**Figure S3.** TG curves of H-Fe<sub>3</sub>O<sub>4</sub>/GS composites.

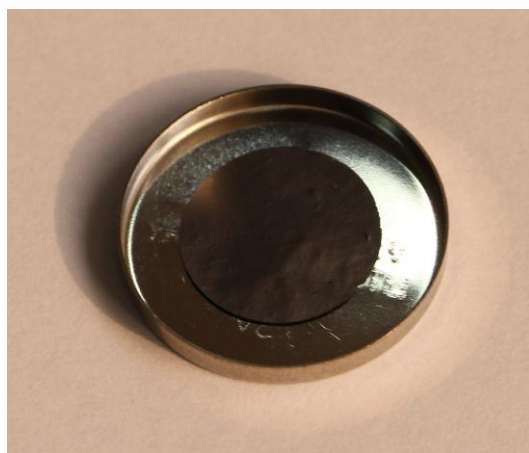

**Figure S4.** A photograph of the free-standing H-Fe<sub>3</sub>O<sub>4</sub>/GS-2 electrode.

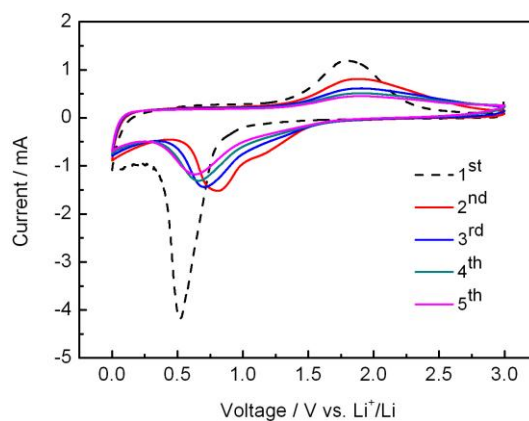

**Figure S5.** Cyclic voltammograms of pure H-Fe<sub>3</sub>O<sub>4</sub> electrode for the first five cycles.

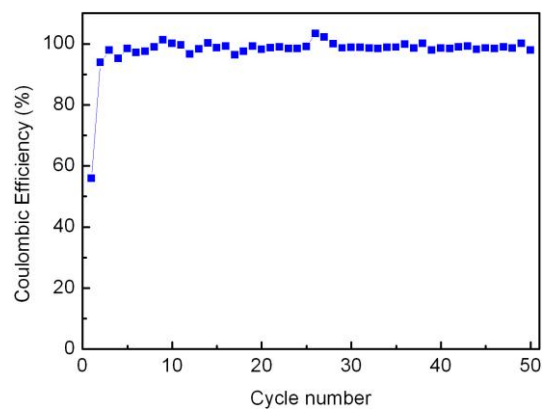

**Figure S6.** Coulombic efficiency of H-Fe<sub>3</sub>O<sub>4</sub>/GS-2 free-standing electrode at a current density of 200 mA g<sup>-1</sup>.

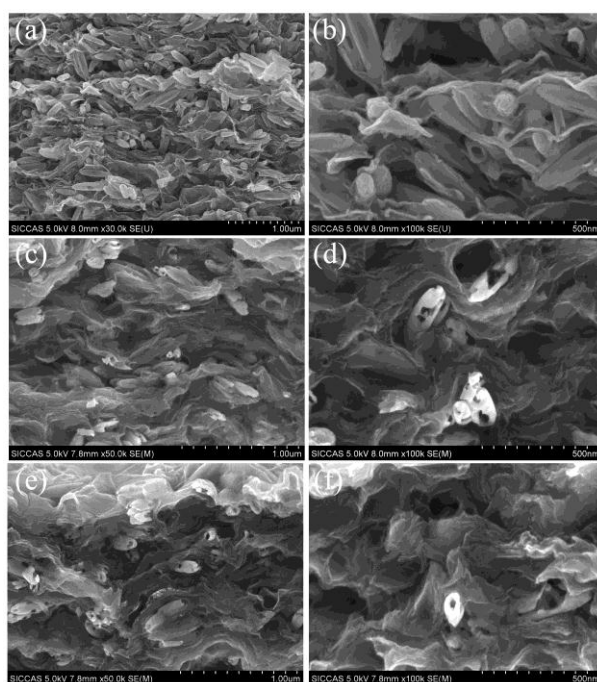

**Figure S7.** SEM images of H-Fe<sub>3</sub>O<sub>4</sub>/GS-1(a-b), H-Fe<sub>3</sub>O<sub>4</sub>/GS-3 (c-d) and H-Fe<sub>3</sub>O<sub>4</sub>/GS-4 (e-f).

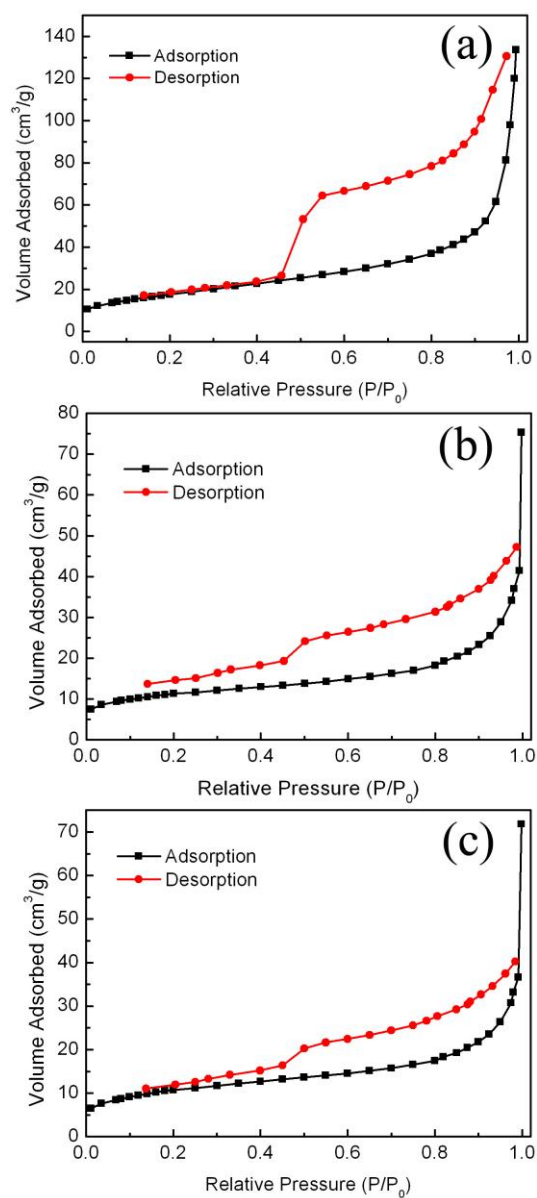

**Figure S8.** Nitrogen adsorption and desorption isotherms of (a) H-Fe<sub>3</sub>O<sub>4</sub>/GS-1, (b) H-Fe<sub>3</sub>O<sub>4</sub>/GS-3 and (c) H-Fe<sub>3</sub>O<sub>4</sub>/GS-4.
